# Supplementary material for: Combined inhibition of AKT and HSF1 suppresses breast cancer stem cells and tumor growth
Source: PubMed Central journal article supplement (PMC5650314; doi:10.18632/oncotarget.18166), 2017-05-22
Supplement: oncotarget-08-73947-s001.pdf [file oncotarget-08-73947-s001.pdf]

## Combined inhibition of AKT and HSF1 suppresses breast cancer stem cells and tumor growth

### SUPPLEMENTARY MATERIALS

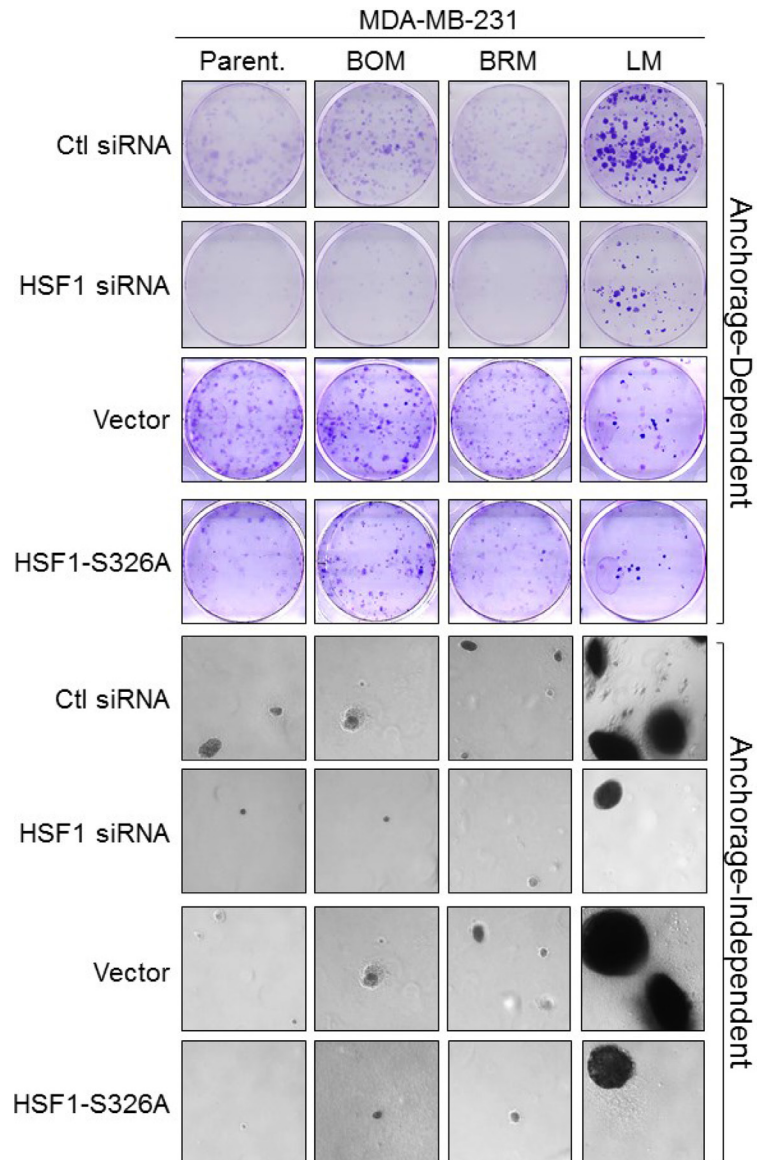

**Supplementary Figure 1: Loss of HSF1 activity reduces colony growth of metastatic cells.** MDA-MB-231 parental, BOM, BRM, and LM cells were transfected with Ctl siRNA, HSF1 siRNA, vector, or HSF1-S326A and subjected to anchorage-dependent (upper) or anchorage-independent (lower) colony assays.

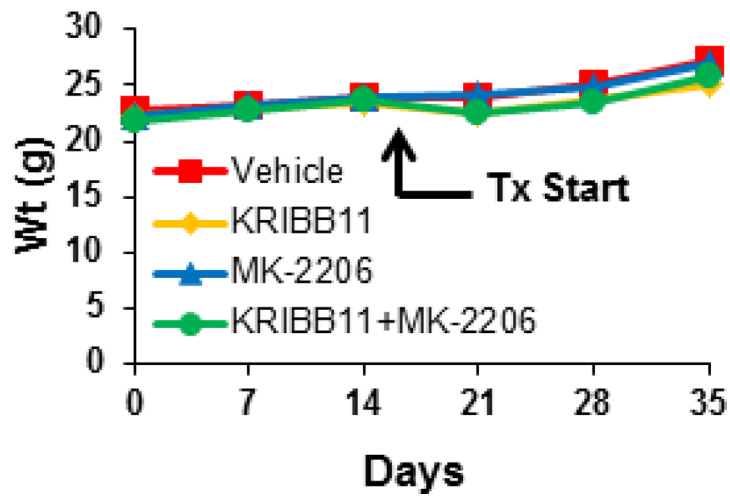

**Supplementary Figure 2: Mouse body weight over course of combination therapy.** MDA-MB-231 cells were implanted in the mammary fat pad of nu/nu mice and tumors were allowed to establish over 2 weeks. After tumor establishment, mice were randomized to either vehicle, KRIBB11 alone, MK-2206 alone, or the combination of KRIBB11 and MK-2206 and treatment continued thereafter for three weeks. Mouse body weight is plotted over the course of the study indicating no changes in mouse body weight.

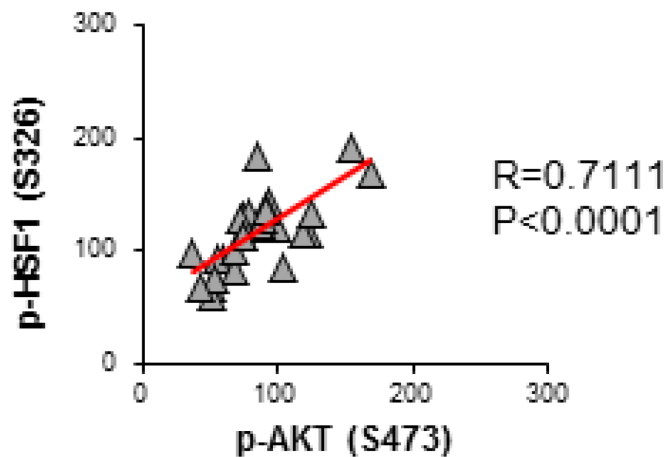

**Supplementary Figure 3: Activation of AKT correlates with activation of HSF1 in MDA-MB-231 orthotopic xenografts.** Immunohistochemistry performed on tumors in Figure 6E were scored for p-AKT (S473) and these scores were correlated with IHC scores from p-HSF1 (S326).

**Supplementary Table 1: siRNA sequences**

| Target       | siRNA Sequence                   |
|--------------|----------------------------------|
| Non-specific | 5'-CCUACGCCACCACUUUCGU(dTdT)-3'  |
| HSF1         | 5'-GAGAUCUAUA AACAGACAG(dTdT)-3' |

**Supplementary Table 2: Mutagenesis primers**

| Primer       | Sequence                                |
|--------------|-----------------------------------------|
| HSF1-S326A-F | 5'-GTGGACACCCTCTTGTCCCCGACCGCCCTCATT-3' |
| HSF1-S326A-R | 5'-AATGAGGGCGGTCGGGGACAAGAGGGTGTCCAC-3' |
